# Supplementary material for: Separation studies of 60Co (II) and 134Cs (I) radionuclides from aqueous solution using starch-grafted citric acid-acrylamide/magnesia hydrogel
Source: publisher site journal article supplement (doi:10.1515/ract-2024-0295), 2024-06-24
Supplement: Supplementary file 1 [file j_ract-2024-0295_suppl_001.docx]

**Supplementary file**

**S1 .** Non- Linear fitting of pseudo 1st order, pseudo 2nd order, Elovich, and linear intra-particle kinetic model for adsorption of 134Cs (I) and 60Co(II) on St3-g-(CA-AM)/MgO

|  |  |  |
| --- | --- | --- |
|  |  |  |

**S2 .** Residual error of the non- Linear fitting of pseudo 1st order, pseudo 2nd order, Elovich, and linear intra-particle kinetic model for adsorption of 134Cs (I) and 60Co(II) on St3-g-(CA-AM)/MgO

**S3**  linear fitting of Langmuir, and Freundlich isotherm model for adsorption of 134Cs(I) and  60Co(II) on St3-g-(CA-AM)/MgOat different temperature

|  |  |  |
| --- | --- | --- |
|  |  |  |

**S4**  Residual error for linear fitting of Langmuir, and Freundlich isotherm model for adsorption of 134Cs(I) and  60Co(II) on St3-g-(CA-AM)/MgOat different temperature
